# Supplementary material for: Implant for Augmentation of Cerebral Blood Flow Trial-1 (ImpACT-1). A single-arm feasibility study evaluating the safety and potential benefit of the Ischemic Stroke System for treatment of acute ischemic stroke
Source: PubMed Central journal article supplement (PMC6609146; doi:10.1371/journal.pone.0217472), 2019-07-03
Supplement: pone.0217472.s002.pdf [file pone.0217472.s002.pdf]

S1 Table: Study Ethics Committees

| Country/Site                                                                      | Ethical Committee/MOH                                                                 | Approval Date | Approval Ref.                          |
|-----------------------------------------------------------------------------------|---------------------------------------------------------------------------------------|---------------|----------------------------------------|
| Israel                                                                            | MoH Israel                                                                            | 18.6.2007     | HTA3740                                |
| Tel Aviv Sourasky Medical Center                                                  | Tel Aviv Sourasky Medical Center Ethical Committee                                    | 20.11.2006    | 06-172                                 |
| India                                                                             |                                                                                       |               |                                        |
| Postgraduate Institute of Medical Education and Research (PGI)                    | Post Graduate Institute of Medical Education & Research – Chandigarh Ethics Committee | 4.7.2006      | Micro/2006/2606                        |
| Nizam's Institute of Medical Sciences                                             | Nizam Institute of Medical Science Ethics Committee                                   | 9.5.2006      | EC/NIMS/614/2006                       |
| Jahangir Hospital, Pune                                                           | Hirabai Cowasji Jehangir Medical research Institute Ethics Committee                  | 2.4.2007      | No reference provided by the committee |
| Maulana Azad Medical College & Associated G.B Pant, L.N and GNEC Hospitals, Delhi | Maulana Azad Medical College Ethics Committee                                         | 21.2.2007     | N.F.501(134)/EC/06/MC(Aca.)/2520       |
| National Institute of Mental Health and Neuro Sciences, Bangalore                 | NIMHNS Ethics Committee                                                               | 24.10.07      | RPA/096/07                             |
| Hungary                                                                           |                                                                                       |               |                                        |
| Aladar Petz County Teaching Hospital, Gyor                                        | Medical Research Council, Scientific and Research Ethics Committee (ETT TUKEB)        | 8.1.2007      | 76-1-35/2006                           |
| Istvan Szechenyi University, Gyor                                                 |                                                                                       | 9.11.2006     |                                        |

|                        |                                                                                                                                     |           |           |
|------------------------|-------------------------------------------------------------------------------------------------------------------------------------|-----------|-----------|
| University of Debrecen | Regional and Institutional Ethics Committee of the Science Council of the University of Debrecen, Medical and Health Science Centre | 26.6.2006 | 2504-2006 |
| B.A.Z. County Hospital | Regional/Local Committee of Science and Research Ethics Borsod-Abaúj-Zemplén and Heves County                                       | 15.8.2007 | N/A       |

|                                                                            |                                                                                   |           |             |
|----------------------------------------------------------------------------|-----------------------------------------------------------------------------------|-----------|-------------|
| Germany                                                                    |                                                                                   |           |             |
| Neurology and Neurochirurgie<br>University Clinic Leipzig                  | Ethical Committee for Medicine, Leipzig<br>University Faculty                     | 21.9.2006 | 180/2006    |
| University Clinic, Heidelberg                                              | Ethical Committee Medicine Faculty<br>Heidelberg                                  | 17.8.2006 | MV-189/2006 |
| Department of Neurology and<br>Stroke Center, University Hospital<br>Essen | Ethical Committee Medicine Faculty<br>University Hospital Essen                   | 18.2.2008 | 08-3614     |
| Friedrich-Alexander-University<br>Erlangen                                 | Ethical Committee Medicine Faculty<br>Friedrich-Alexander- University<br>Erlangen | 18.9.2006 | 3545        |
| Albert-Ludwigs University of<br>Freiburg                                   | Albert-Ludwigs-University-Ethical<br>Committee<br>Freiburg                        | 12.2.2008 | 43/08       |
